# Supplementary material for: Machine Learning Models for Parkinson Disease: Systematic Review
Source: PubMed Central journal article supplement (PMC11112052; doi:10.2196/50117), 2024-05-17
Supplement: medinform-v12-e50117-s001.pdf [file medinform-v12-e50117-s001.pdf]

Supplementary Table 1:

**Data curation Questions**

| Questions                                                                                                                                                                            | Options                                                                                                                                                                                                                                                                              |
|--------------------------------------------------------------------------------------------------------------------------------------------------------------------------------------|--------------------------------------------------------------------------------------------------------------------------------------------------------------------------------------------------------------------------------------------------------------------------------------|
| 1. What have the authors classified using machine learning?                                                                                                                          | <input type="checkbox"/> PD vs Non-PD<br><input type="checkbox"/> PD, Non-PD and other diseases<br><input type="checkbox"/> PD severity (Unified Parkinson Disease Rating Scale (UPDRS) or Hoehn and Yahr (H&R))<br><input type="checkbox"/> PD Symptoms (UPDRS scores)              |
| 2. How many PD subjects were in this study?                                                                                                                                          | Fill in the blank.                                                                                                                                                                                                                                                                   |
| 2.1 If there are subcategories of PD, what is the distribution of those categories? For example {"PD-NC": 35, "PD-MCI": 58}' otherwise "Not Mentioned"                               | Fill in the blank.                                                                                                                                                                                                                                                                   |
| 3. If reported, what were the mean and standard deviations of the PD subjects' Hoehn and Yahr scores? If not reported, put, "Not Mentioned". If raw data is reported, put "Raw data" | Fill in the blank.                                                                                                                                                                                                                                                                   |
| 3.1 Copy and paste the distribution data for Hoehn and Yahr scores.                                                                                                                  | Fill in the blank.                                                                                                                                                                                                                                                                   |
| 4. If reported, what were the mean and standard deviations of the PD subjects' UPDRS scores? If not reported, put, "Not Mentioned". If raw data is reported, put "Raw data"          | Fill in the blank.                                                                                                                                                                                                                                                                   |
| 4.1 Copy and paste the distribution data for UPDRS scores.                                                                                                                           | Fill in the blank.                                                                                                                                                                                                                                                                   |
| 5. How many control subjects are in this study if any? If there was no control subjects just mention "No Control"                                                                    | Fill in the blank.                                                                                                                                                                                                                                                                   |
| 6. How many other disease subjects? "If there is no other disease subjects mention "No other disease"                                                                                | Fill in the blank.                                                                                                                                                                                                                                                                   |
| 7. Was there any information about the subjects being on or off medication for periods of time prior to the experiment?                                                              | <input type="radio"/> Not Mentioned<br><input type="radio"/> Medication OFF<br><input type="radio"/> Medication ON<br><input type="radio"/> Mentioned, but the authors did not direct patients to be on or off their medication.<br><input type="radio"/> Both Medication ON and OFF |

|                                                                                                                                                                                        |                                                                                                                                                                                                                                                                                                                                                                                                                                                                                                                                                                                                                                                                                                                                                                                                                                                                                                                            |
|----------------------------------------------------------------------------------------------------------------------------------------------------------------------------------------|----------------------------------------------------------------------------------------------------------------------------------------------------------------------------------------------------------------------------------------------------------------------------------------------------------------------------------------------------------------------------------------------------------------------------------------------------------------------------------------------------------------------------------------------------------------------------------------------------------------------------------------------------------------------------------------------------------------------------------------------------------------------------------------------------------------------------------------------------------------------------------------------------------------------------|
| <p>8. What class imbalance mitigation techniques did the authors perform?</p>                                                                                                          | <ul style="list-style-type: none"> <li><input type="checkbox"/> Over/Under Sampling</li> <li><input type="checkbox"/> Class weights on evaluation metrics'</li> <li><input type="checkbox"/> The authors did not report any class imbalance mitigation strategies</li> <li><input type="checkbox"/> Other</li> </ul>                                                                                                                                                                                                                                                                                                                                                                                                                                                                                                                                                                                                       |
| <p>9. How did the authors of the paper split/cross-validate the dataset while training the model?</p>                                                                                  | <ul style="list-style-type: none"> <li><input type="radio"/> The authors did not split the dataset into separate training and test sets and did not use cross-validation (did not separate train &amp; test sets at all).</li> <li><input type="radio"/> The authors performed only cross-validation (train and "test" sets separated through cross-validation only. No use of a hold-out test set for final evaluation.)</li> <li><input type="radio"/> The authors performed cross-validation while training the model, followed by a hold-out test set evaluation.</li> <li><input type="radio"/> The authors split the data into three distinct sets; a training set, a hold-out validation set, and a hold-out test set. (No cross-validation was performed)</li> <li><input type="radio"/> Did not mention anything about data splitting</li> <li><input type="radio"/> Only separated train and test set</li> </ul> |
| <p>10. If cross-validation was applied, which one(s) were applied?</p>                                                                                                                 | <ul style="list-style-type: none"> <li><input type="checkbox"/> K-fold cross-validation</li> <li><input type="checkbox"/> subject-wise cross-validation</li> <li><input type="checkbox"/> stratified cross-validation</li> <li><input type="checkbox"/> nested cross-validation</li> <li><input type="checkbox"/> leave one out cross-validation</li> <li><input type="checkbox"/> record-wise cross-validation</li> <li><input type="checkbox"/> Did not do any cross-validation</li> </ul>                                                                                                                                                                                                                                                                                                                                                                                                                               |
| <p>11. Have the authors made the reader aware of the potential of the model(s) having overinflated performance results (e.g. the model overfitting the training data)? If so, how?</p> | <ul style="list-style-type: none"> <li><input type="radio"/> No, not addressed at all.</li> <li><input type="radio"/> Yes, brief mention of the concept and the term overfitting.</li> <li><input type="radio"/> Yes, in-depth discussion about overfitting and the need for a hold-out test set to mitigate overinflated results.</li> </ul>                                                                                                                                                                                                                                                                                                                                                                                                                                                                                                                                                                              |
| <p>11.1 Copy and paste the overfitting discussion.</p>                                                                                                                                 | <p>Fill in the blank.</p>                                                                                                                                                                                                                                                                                                                                                                                                                                                                                                                                                                                                                                                                                                                                                                                                                                                                                                  |
| <p>12. Did the authors include a section analyzing the reasons for the models' errors/misclassifications?</p>                                                                          | <ul style="list-style-type: none"> <li><input type="radio"/> Yes,</li> <li><input type="radio"/> No</li> </ul>                                                                                                                                                                                                                                                                                                                                                                                                                                                                                                                                                                                                                                                                                                                                                                                                             |
| <p>12.1 Copy and paste the error/misclassification analysis.</p>                                                                                                                       | <p>Fill in the blank.</p>                                                                                                                                                                                                                                                                                                                                                                                                                                                                                                                                                                                                                                                                                                                                                                                                                                                                                                  |
| <p>13. How did they compare their model?</p>                                                                                                                                           | <ul style="list-style-type: none"> <li><input type="checkbox"/> Compared with benchmarks/previous models</li> <li><input type="checkbox"/> Compared with their own multiple models</li> <li><input type="checkbox"/> Made a comparison after real-life deployment</li> </ul>                                                                                                                                                                                                                                                                                                                                                                                                                                                                                                                                                                                                                                               |

|                                                                                                 |                                                                                                                                                                                                                                                                                                                                           |
|-------------------------------------------------------------------------------------------------|-------------------------------------------------------------------------------------------------------------------------------------------------------------------------------------------------------------------------------------------------------------------------------------------------------------------------------------------|
|                                                                                                 | <input type="checkbox"/> Not mentioned (Only reported results of one model)                                                                                                                                                                                                                                                               |
| 14. How has the hyperparameter tuning been done?                                                | <input type="checkbox"/> Ad-Hoc (Researchers' best guess and/or trial and error)<br><input type="checkbox"/> Grid Search (Systematic method of trying many options)<br><input type="checkbox"/> Random Search (Defining a search space and random sampling those options)<br><input type="checkbox"/> Not mentioned (Please double check) |
| 15. Did the authors use multiple evaluation metrics to measure the performance of the model(s)? | <input type="radio"/> No, only one metric such as accuracy was reported.<br><input type="radio"/> Yes, multiple metrics were reported.                                                                                                                                                                                                    |
